# Supplementary material for: Anxiety severity and cognitive function in primary care patients with anxiety disorder: a cross-sectional study
Source: Springer Nature journal article supplement (doi:10.1186/s12888-021-03618-z), 2021-12-09
Supplement: MOESM1 [file 19946406]

**Additional file 1.** Frequency distribution of performance scores on cognitive tests.

Frequency distribution of performance scores on WAIS-IV block design, digit span and matrix reasoning tests and D-KEFS design fluency test showing total correct designs and total attempted designs subtests, among primary care patients with anxiety disorders. The black curve represents a normal approximation curve, for comparison.

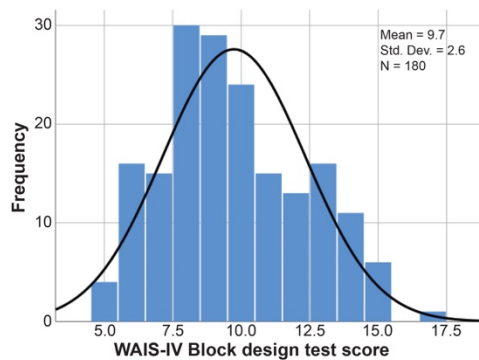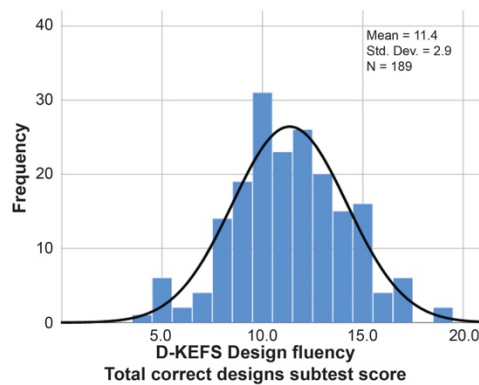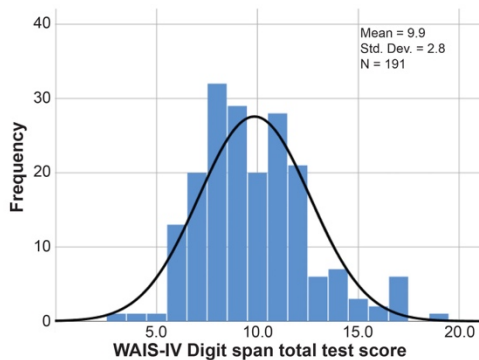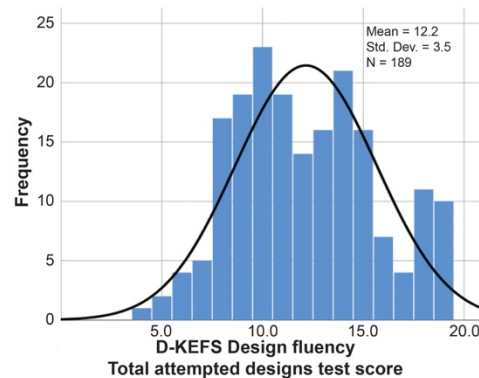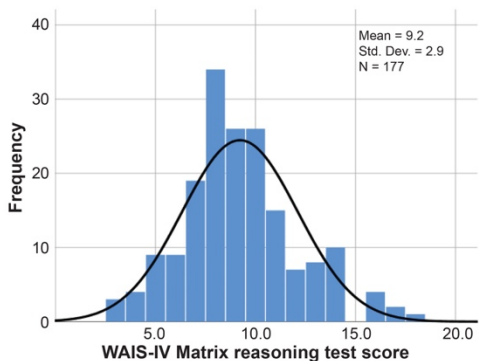

WAIS: Wechsler Adult Intelligence Scale; D-KEFS: Delis–Kaplan Executive Function System; Std.Dev.: standard deviation; N: numbers
