# Supplementary material for: Anxiety severity and cognitive function in primary care patients with anxiety disorder: a cross-sectional study
Source: Springer Nature journal article supplement (doi:10.1186/s12888-021-03618-z), 2021-12-09
Supplement: MOESM2 [file 19946406]

**Additional file 2.** Characteristics of study participants with anxiety disorders with or without ongoing antidepressant and/or psycholeptic/antiepileptic medication.

| Variables                                 | No medication      |    | Medication         |     | p-value      |
|-------------------------------------------|--------------------|----|--------------------|-----|--------------|
|                                           | Mean [SD] or N (%) | N  | Mean [SD] or N (%) | N   |              |
| Age (years)                               | 36.7 [11.1]        | 63 | 39.7 [12.6]        | 126 | 0.15         |
| Men                                       | 24 (38.1)          | 63 | 35 (27.8)          | 126 | 0.15         |
| Education above high school               | 35 (55.6)          | 63 | 69 (55.6)          | 124 | 0.99         |
| Smoking                                   | 5 (8.1)            | 62 | 33 (26.2)          | 126 | <b>0.04</b>  |
| Psychotropic medication                   |                    |    |                    |     |              |
| Antidepressants <sup>a</sup>              |                    |    | 101 (80.2)         | 126 |              |
| Psycholeptics/antiepileptics <sup>b</sup> |                    |    | 56 (44.4)          | 126 |              |
| Unmarried                                 | 41 (67.2)          | 61 | 90 (72.6)          | 124 |              |
| Married                                   | 20 (32.8)          | 61 | 34 (27.4)          | 124 |              |
| <b>Rating Scales:</b>                     |                    |    |                    |     |              |
| BAI (score)                               | 24.2 [12.7.8]      | 63 | 25.2 [12.7]        | 126 | 0.59         |
| MADRS-S (score)                           | 20.0 [8.3]         | 63 | 22.5 [8.0]         | 126 | <b>0.044</b> |
| <b>WAIS-IV test scores:</b>               |                    |    |                    |     |              |
| Block design                              | 9.5 [3.0]          | 57 | 9.3 [3.2]          | 120 | 0.80         |
| Digit span total                          | 9.9 [3.1]          | 63 | 9.8 [2.6]          | 125 | 0.97         |
| Digit span forward                        | 9.1 [3.5]          | 57 | 9.0 [3.3]          | 120 | 0.91         |
| Digit span backward                       | 9.7 [3.1]          | 57 | 9.9 [2.5]          | 120 | 0.36         |
| Digit span sequencing                     | 9.5 [3.1]          | 57 | 9.4 [2.7]          | 120 | 0.84         |
| Matrix reasoning                          | 9.7 [2.8]          | 56 | 9.1 [2.9]          | 118 | 0.26         |
| <b>D-KEFS design fluency test scores:</b> |                    |    |                    |     |              |
| Total correct designs                     | 11.4 [3.0]         | 63 | 11.4 [2.8]         | 123 | 0.97         |
| Correct designs condition 1               | 10.4 [3.1]         | 63 | 10.7 [2.6]         | 123 | 0.46         |
| Correct designs condition 2               | 10.4 [2.8]         | 63 | 10.5 [2.7]         | 123 | 0.88         |
| Correct designs condition 3               | 11.7 [2.6]         | 63 | 11.3 [2.8]         | 123 | 0.55         |
| Total attempted designs                   | 12.1 [3.5]         | 63 | 12.2 [3.5]         | 123 | 0.76         |
| <b>Anxiety diagnoses:</b>                 |                    |    |                    |     |              |
| Panic disorder                            | 36 (58.1)          | 62 | 64 (50.8)          | 126 | 0.35         |
| Generalized anxiety disorder              | 34 (54.8)          | 62 | 73 (57.9)          | 126 | 0.69         |
| Mixed anxiety and depression              | 4 (6.5)            | 62 | 8 (6.3)            | 126 | 0.98         |
| Anxiety (Unspecified)                     | 7 (11.3)           | 62 | 12 (9.5)           | 126 | 0.71         |
| <b>Comorbidities:</b>                     |                    |    |                    |     |              |
| Major depression                          | 22 (35.5)          | 62 | 56 (44.4)          | 126 | 0.24         |
| Suicidality                               | 9 (14.5)           | 62 | 34 (27.0)          | 126 | 0.056        |
| Social phobia                             | 23 (37.1)          | 62 | 53 (42.1)          | 126 | 0.51         |
| Agoraphobia                               | 16 (25.8)          | 62 | 48 (38.1)          | 126 | 0.095        |
| Post-traumatic stress disorder            | 9 (14.5)           | 62 | 17 (13.5)          | 126 | 0.85         |
| Alcohol use disorder                      | 2 (3.2)            | 62 | 17 (13.5)          | 126 | <b>0.028</b> |
| Substance use                             | 0                  | 62 | 4 (3.2)            | 126 | 0.16         |
| Personality disorder (Antisocial)         | 6 (9.7)            | 62 | 13 (10.3)          | 126 | 0.89         |
| Obsessive compulsive disorder             | 10 (16.1)          | 62 | 10 (7.9)           | 126 | 0.087        |
| Bulimia Nervosa                           | 5 (8.1)            | 62 | 7 (5.6)            | 126 | 0.51         |

<sup>a</sup> ATC N06

<sup>b</sup> ATC N03 and N05

Values are given as means and standard deviations (SD) for continuous variables and frequencies with percentages for categorical variables along with the total number (N) of participants included in each analysis. P-value was based on  $\chi^2$ -test and Mann-Whitney U-test comparing patients with Minimal/Mild (BAI 0-16) vs Moderate/Severe anxiety (BAI 17-63). Statistically significant results ( $p < 0.05$ ) indicated in bold.

D-KEFS: Delis–Kaplan Executive Function System; MADRS-S: Montgomery Åsberg Depression Rating Scale Self-rated; WAIS: Wechsler Adult Intelligence Scale.
