# Supplementary material for: Anxiety severity and cognitive function in primary care patients with anxiety disorder: a cross-sectional study
Source: Springer Nature journal article supplement (doi:10.1186/s12888-021-03618-z), 2021-12-09
Supplement: MOESM4 [file 19946406]

**Additional file 4.** Performance scores on cognitive tests in patients with anxiety disorders compared to a normed population.

| Cognitive function test      | Mean  | SD   | N-1 | t*    | Wilcoxon p       |
|------------------------------|-------|------|-----|-------|------------------|
| <b>WAIS IV</b>               |       |      |     |       |                  |
| Block design                 | 9.37  | 3.11 | 176 | -2.71 | <b>0.049</b>     |
| Digit span total             | 9.85  | 2.77 | 187 | -0.74 | 0.11             |
| Digit span forward           | 9.03  | 3.38 | 176 | -3.83 | <b>&lt;0.001</b> |
| Digit span backward          | 9.83  | 2.72 | 176 | -0.83 | 0.15             |
| Digit span sequencing        | 9.39  | 2.83 | 176 | -2.87 | <b>0.001</b>     |
| Matrix reasoning             | 9.27  | 2.88 | 173 | -3.34 | <b>&lt;0.001</b> |
| <b>D-KEFS design fluency</b> |       |      |     |       |                  |
| Total correct designs        | 11.39 | 2.85 | 185 | 6.65  | <b>&lt;0.001</b> |
| Correct designs condition 1  | 10.60 | 2.80 | 185 | 2.91  | <b>0.006</b>     |
| Correct designs condition 2  | 10.47 | 2.70 | 185 | 2.39  | <b>0.036</b>     |
| Correct designs condition 3  | 11.43 | 2.74 | 185 | 7.12  | <b>&lt;0.001</b> |
| Total attempted designs      | 12.18 | 3.50 | 185 | 8.50  | <b>&lt;0.001</b> |

Performance scores on block design, digit-span and matrix reasoning tests (WAIS-IV) and design fluency (D-KEFS) for patients with anxiety disorder compared to a normed population.

\* normed mean for the population is 10 (SD3) for WAIS IV and D-KEFS.

SD: standard deviation; N-1: degrees of freedom; t: t-values from the

$F(df_{\text{regression}}, df_{\text{residual}}) = F_{\text{regression}}$  equation.

WAIS: Wechsler Adult Intelligence Scale; D-KEFS: Delis–Kaplan Executive Function System
